# Supplementary material for: Dietary supplementation with flaxseed meal and oat hulls modulates intestinal histomorphometric characteristics, digesta- and mucosa-associated microbiota in pigs
Source: PubMed Central journal article supplement (PMC5897541; doi:10.1038/s41598-018-24043-5), 2018-04-12
Supplement: 41598_2018_24043_MOESM1_ESM.pdf [file 41598_2018_24043_MOESM1_ESM.pdf]

1 **Supplementary information**

2 **Running title: Dietary fiber alters intestinal milieu**

3

4 **Dietary supplementation with flaxseed meal and oat hulls modulates intestinal**  
5 **histomorphometric characteristics, digesta- and mucosa-associated microbiota in pigs**

6

7 **S.P. Ndou<sup>a</sup>, H.M. Tun<sup>a</sup>, E. Kiarie<sup>a,b</sup>, M.C. Walsh<sup>d</sup>, E. Khafipour<sup>a,c,\*</sup> and C.M. Nyachoti<sup>a,\*</sup>**

8

9 *<sup>a</sup>Department of Animal Science, University of Manitoba, Winnipeg, MB, Canada. R3T 2N2*

10 *<sup>b</sup>Department of Animal Biosciences, University of Guelph, Guelph, ON, Canada, N1G 2W1*

11 *<sup>c</sup>Department of Medical Microbiology, University of Manitoba, Winnipeg, MB, Canada. R3T*

12 *2N2*

13 *<sup>d</sup>DuPont Industrial Biosciences-Danisco Animal Nutrition, Marlborough, Wiltshire, United*

14 *Kingdom SN8 1XN*

15

16 \*Co-corresponding author:

17 Dr. Martin Nyachoti, Tel: +1-204-474-7323; Fax: +1-204-474-7628; EMail:

18 [Martin\\_Nyachoti@umanitoba.ca](mailto:Martin_Nyachoti@umanitoba.ca)

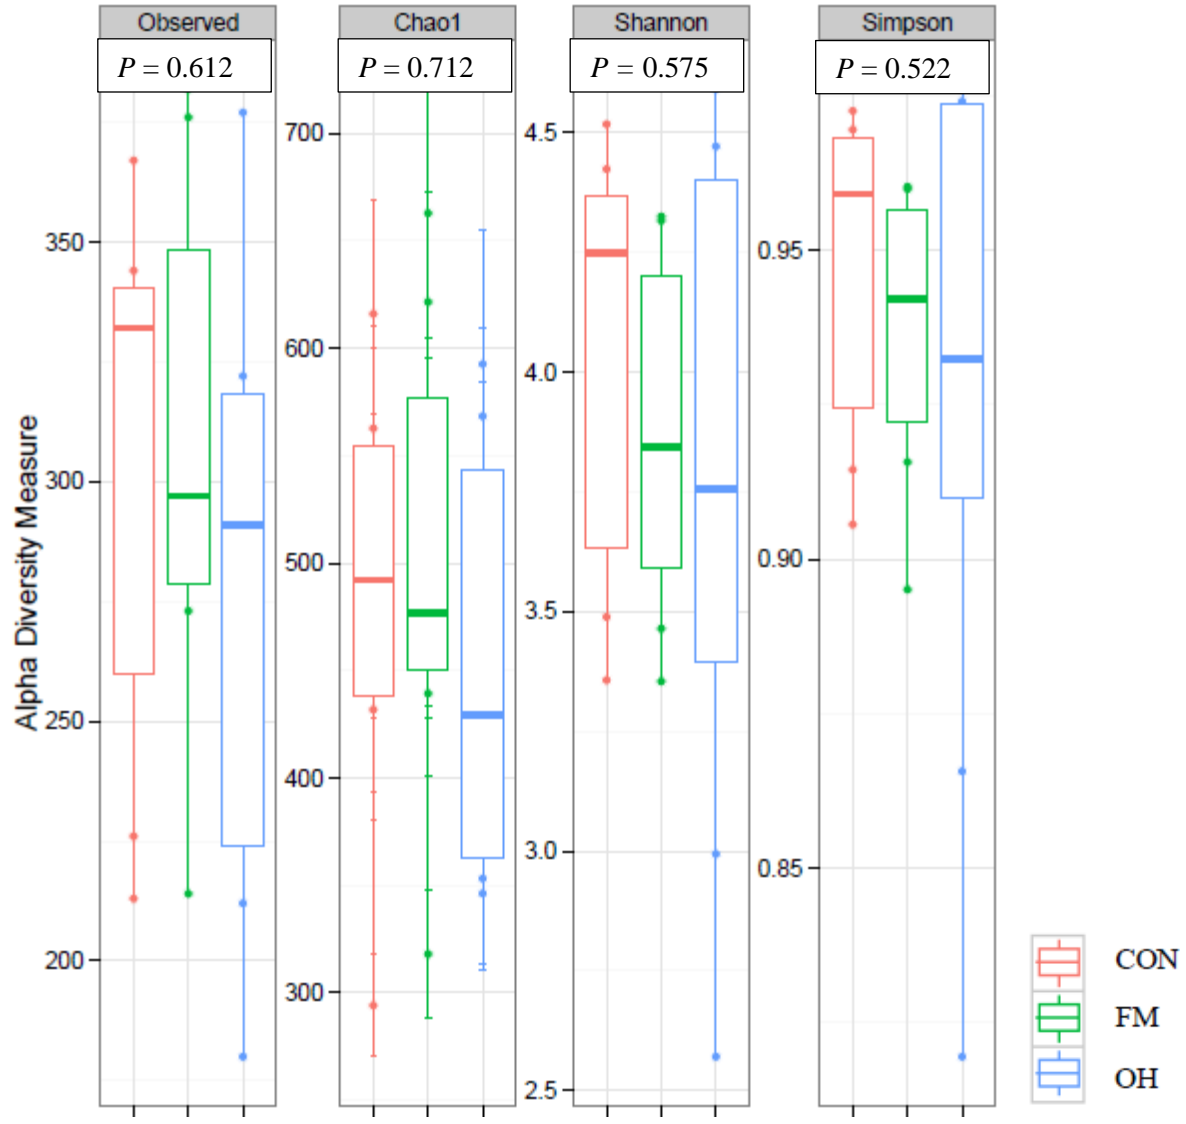

19

20 Supplementary Figure S1: Alpha-diversity indices of microbiota in ileal digesta of pigs fed with  
 21 control (CON), flaxseed meal (FM) and oat hulls (OH) diets

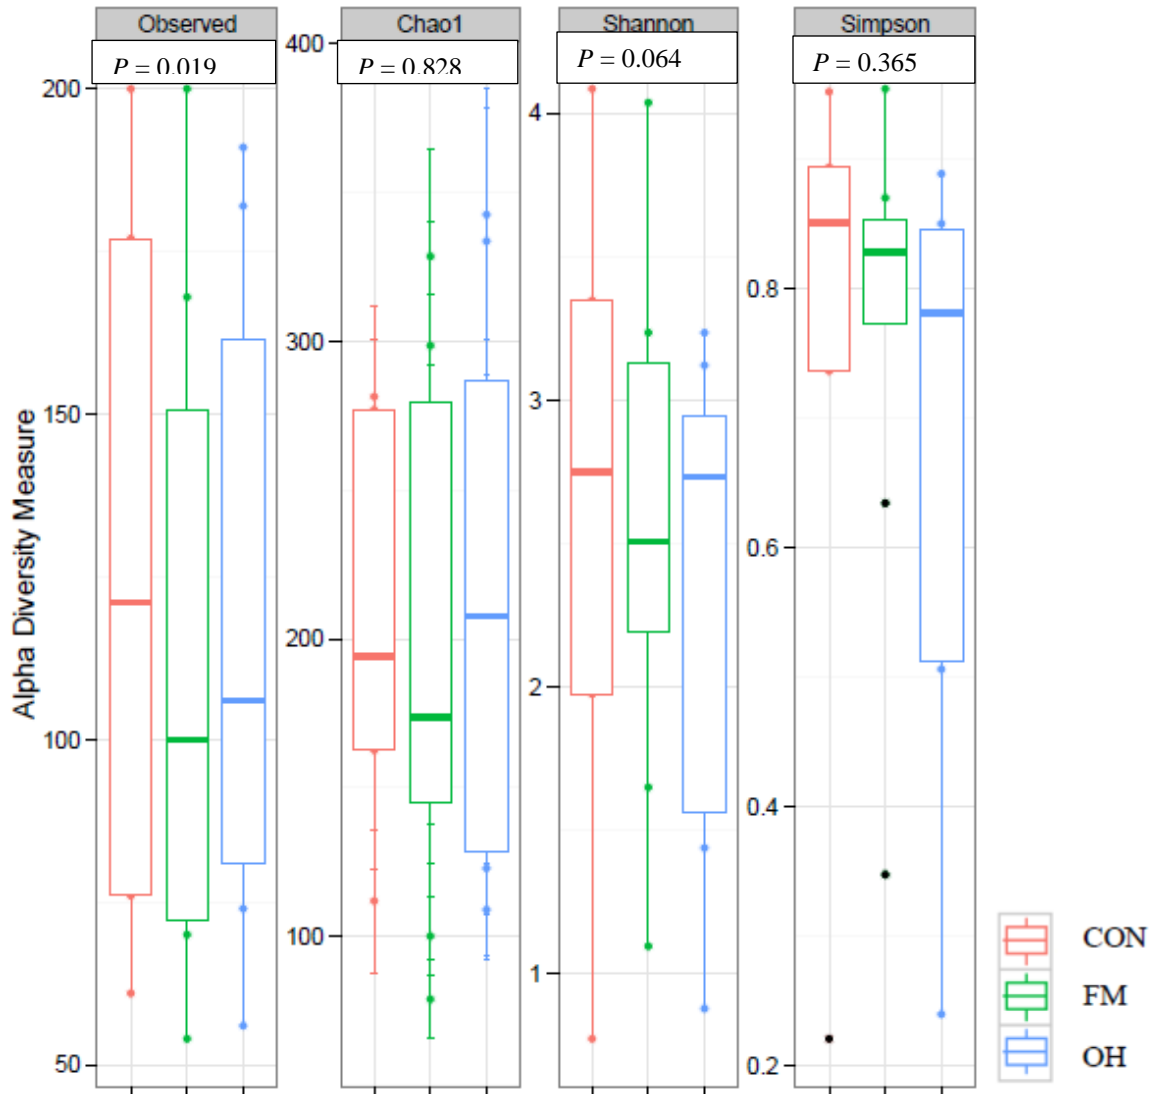

22

23 Supplementary Figure S2: Alpha-diversity indices of ileal mucosa-associated microbiota of pigs  
 24 fed with control (CON), flaxseed meal (FM) and oat hulls (OH) diets

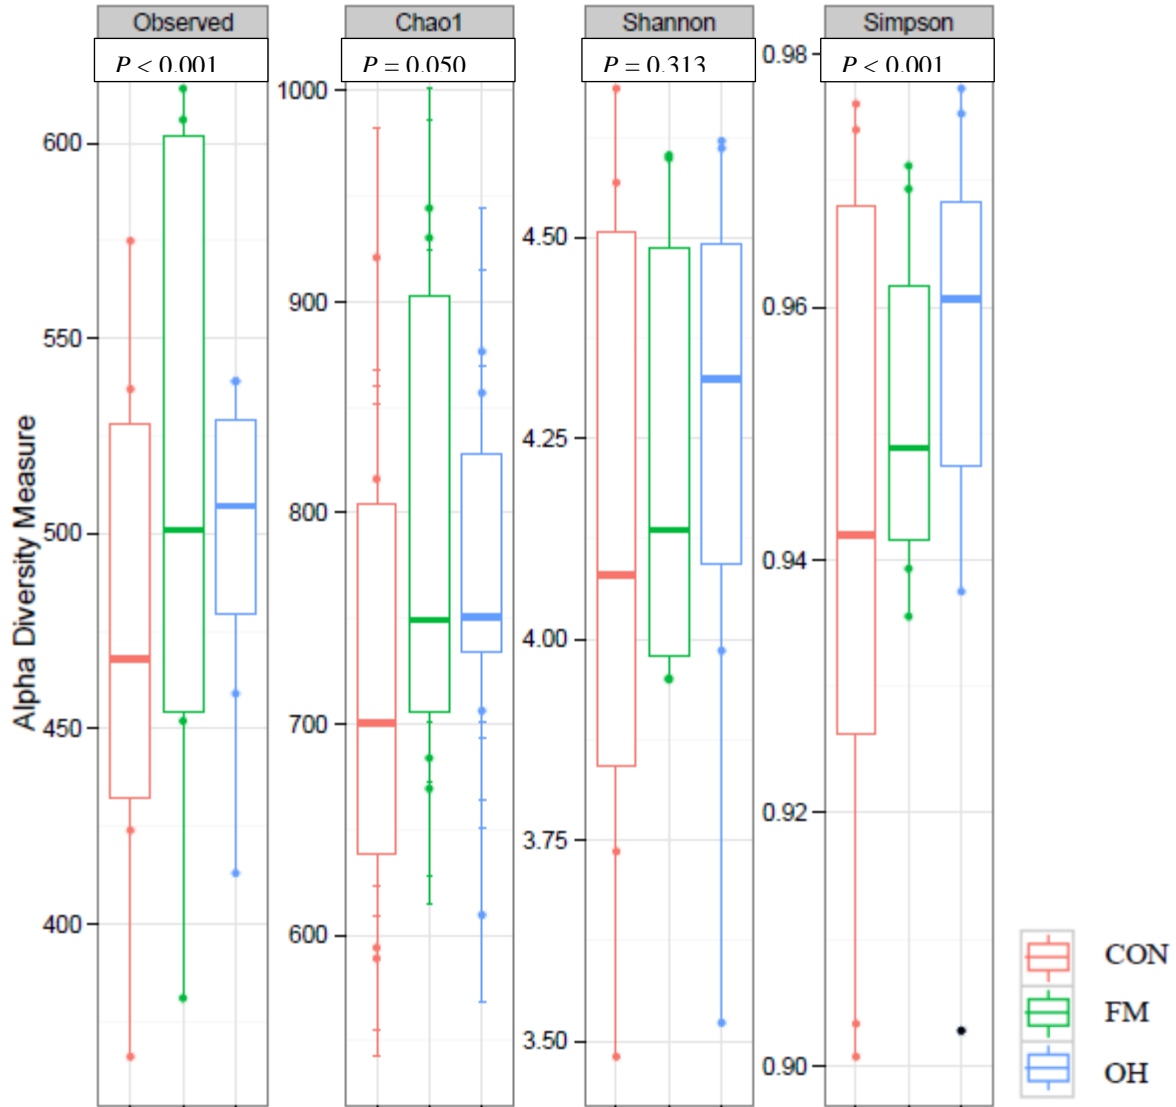

25

26 Supplementary Figure S3: Alpha-diversity indices of microbiota in cecal digesta of pigs fed with  
 27 control (CON), flaxseed meal (FM) and oat hulls (OH) diets

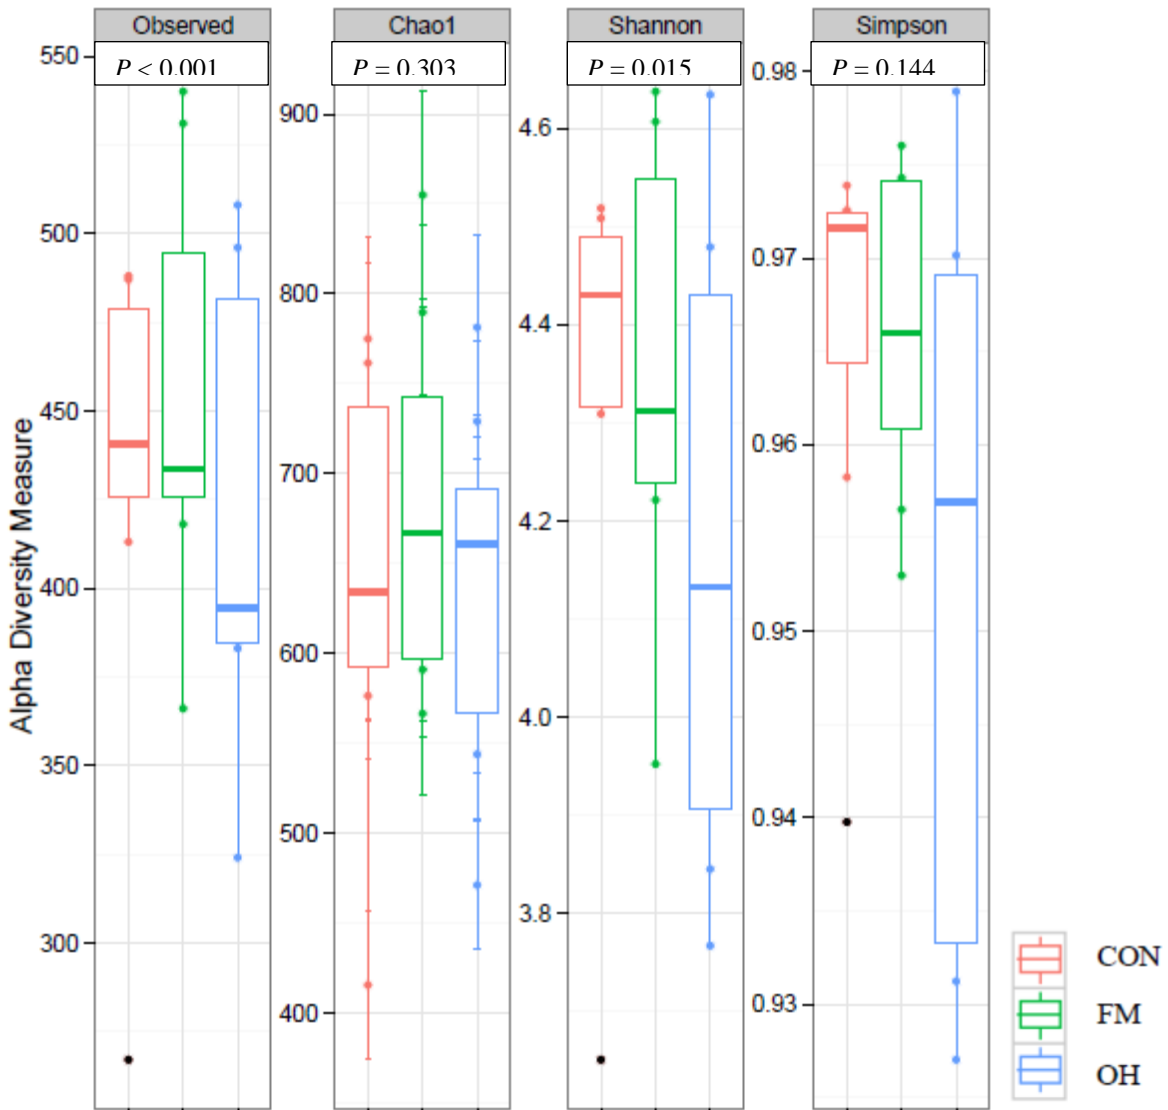

28

29 Supplementary Figure S4: Alpha-diversity indices of cecal mucosa-associated microbiota of pigs  
 30 fed with control (CON), flaxseed meal (FM) and oat hulls (OH) diets.

31

32 Table S1. Ingredient composition and calculated provisions of the control, flaxseed meal and oat  
 33 hulls diets<sup>1</sup>

|                                            | Diet <sup>1</sup> |       |        |
|--------------------------------------------|-------------------|-------|--------|
|                                            | CON               | FM    | OH     |
| Ingredients                                |                   |       |        |
| Corn                                       | 64.53             | 57.40 | 52.99  |
| Oat hulls                                  | -                 | -     | 10.00  |
| Flaxseed meal                              | -                 | 12.00 | -      |
| Soybean meal, 44 % CP                      | 31.00             | 25.49 | 31.500 |
| Vegetable oil                              | 1.354             | 2.044 | 2.390  |
| Limestone                                  | 0.683             | 0.667 | 0.640  |
| Monocalcium phosphate                      | 0.752             | 0.637 | 0.750  |
| Salt                                       | 0.35              | 0.35  | 0.35   |
| Vitamin-mineral premix <sup>2</sup>        | 1.00              | 1.00  | 1.00   |
| L-Lysine HCl                               | -                 | 0.086 | 0.010  |
| DL-Methionine                              | 0.031             | 0.010 | 0.060  |
| Threonine                                  | -                 | 0.012 | 0.010  |
| Titanium dioxide                           | 0.30              | 0.30  | 0.30   |
| Calculated dietary provisions <sup>3</sup> |                   |       |        |
| ME kcal/kg                                 | 3,330             | 3,334 | 3,326  |
| CP, %                                      | 18.10             | 18.70 | 18.01  |
| SID Lys, %                                 | 0.99              | 0.99  | 0.99   |
| SID Met, %                                 | 0.30              | 0.31  | 0.30   |
| SID Met + Cys, %                           | 0.58              | 0.61  | 0.55   |
| SID Thr, %                                 | 0.62              | 0.60  | 0.60   |
| SID Trp, %                                 | 0.21              | 0.17  | 0.18   |

34 <sup>1</sup>CON = control diet; FM = flaxseed meal-containing diet; OH = oat hulls-containing diet.

35 <sup>2</sup>Provided the following nutrients per kg of air-dry diet: 8,250 IU retinol (Vitamin A); 200 IU  
 36 cholecalciferol (Vitamin D<sub>3</sub>); 40 UI α-tocopherol (Vitamin E); 4 mg Vitamin K; 1.5 mg Vitamin  
 37 B<sub>1</sub>; 7 mg Vitamin B<sub>2</sub>; 2.5 mg Vitamin B<sub>6</sub>; 25 µg Vitamin B<sub>12</sub>; 14 mg calcium pantothenate; 2 mg  
 38 folic acid; 21 mg niacin (Vitamin B<sub>3</sub>); and 200 µg biotin (Vitamin B<sub>7</sub>). Minerals: 15 mg Cu (as  
 39 copper sulphate); 0.4 mg iodine (as potassium iodine); 120 mg iron (as ferrous sulphate); 20 mg  
 40 Mn (as manganese oxide); 0.3 mg Se (as sodium selenite); 110 mg Zn (as zinc oxide).

41 <sup>3</sup>The nutrient compositions were calculated based on ingredient composition values from  
 42 NRC (2012) and our laboratory.

43  
 44  
 45  
 46  
 47  
 48

49 Table S2. Analyzed composition of the experimental diets

| Item                                       | Diets <sup>1</sup> |             |             |
|--------------------------------------------|--------------------|-------------|-------------|
|                                            | CON                | FM          | OH          |
| Chemical composition                       |                    |             |             |
| Crude protein (N × 6.25), %                | 19.14              | 19.33       | 19.24       |
| Gross energy, kcal/kg                      | 3879               | 3886        | 3977        |
| Fat content, %                             | 4.58               | 5.32        | 5.94        |
| Calcium                                    | 0.61               | 0.62        | 0.60        |
| Phosphorus                                 | 0.58               | 0.63        | 0.58        |
| Neutral detergent fiber, %                 | 9.37               | 17.9        | 18.6        |
| Acid detergent fiber, %                    | 3.6                | 4.8         | 7.2         |
| NSP constituent sugars, % <sup>2</sup>     |                    |             |             |
| Total NSP                                  | 9.48 (0.80)        | 13.3 (3.50) | 15.0 (1.79) |
| Arabinose                                  | 1.80 (0.16)        | 2.20 (0.36) | 1.84 (0.06) |
| Xylose                                     | 1.83 (0.06)        | 2.76 (0.79) | 4.81 (0.38) |
| Mannose                                    | 0.26 (0.00)        | 0.23 (0.06) | 0.22 (0.01) |
| Galactose                                  | 1.50 (0.15)        | 1.75 (0.50) | 1.30 (0.06) |
| Glucose                                    | 2.78 (0.43)        | 4.26 (1.29) | 5.60 (0.94) |
| Uronic acids                               | 1.32 (0.12)        | 2.10 (0.50) | 1.20 (0.35) |
| Physical properties                        |                    |             |             |
| Bulk density, g/ml                         | 1.56               | 1.43        | 1.36        |
| Swelling capacity, ml/g                    | 2.67               | 4.51        | 2.85        |
| Water holding capacity, ml/g               | 3.31               | 5.98        | 4.52        |
| <sup>3</sup> Particle size distribution, % |                    |             |             |
| >1700 μm                                   | 19.8               | 20.6        | 18.2        |
| > 850 μm                                   | 19.3               | 16.6        | 22.7        |
| < 600 μm                                   | 61.0               | 62.8        | 59.1        |

50 <sup>1</sup>CON = control diet; FM = flaxseed meal-containing diet; OH = oat hulls-containing diet.

51 NSP = non-starch polysaccharides.

52 <sup>2</sup>Values in parentheses are for the soluble proportions of the NSP.53 <sup>3</sup>100 g of sample size for each diet.

54

55

56

57

58

59

60

61

62

63

64 Table S3. Intake of dietary components and growth performance of growing pigs fed the control,  
 65 flaxseed meal and oat hulls diets<sup>1</sup>

| <sup>3</sup> Item              | <sup>2</sup> Diet  |                    |                    | SEM <sup>3</sup> | <i>P</i> -value |
|--------------------------------|--------------------|--------------------|--------------------|------------------|-----------------|
|                                | CON                | FM                 | OH                 |                  |                 |
| Intake of dietary components   |                    |                    |                    |                  |                 |
| Gross energy, MJ/d             | 30.02 <sup>b</sup> | 26.80 <sup>c</sup> | 32.21 <sup>a</sup> | 0.724            | <0.001          |
| Metabolizable energy, MJ/g     | 25.86 <sup>a</sup> | 22.79 <sup>b</sup> | 24.84 <sup>a</sup> | 0.602            | 0.006           |
| Crude protein, g/d             | 354.6              | 342.8              | 354.3              | 8.582            | 0.551           |
| Fat, g/d                       | 84.7 <sup>b</sup>  | 87.8 <sup>b</sup>  | 109.4 <sup>a</sup> | 2.264            | <0.001          |
| Soluble NSP <sup>4</sup> , g/d | 14.80 <sup>c</sup> | 57.69 <sup>a</sup> | 32.96 <sup>b</sup> | 0.939            | <0.001          |
| Insoluble NSP, g/d             | 160.6 <sup>b</sup> | 161.5 <sup>b</sup> | 180.5 <sup>a</sup> | 4.066            | 0.003           |
| Total NSP, g/d                 | 175.4 <sup>c</sup> | 219.2 <sup>b</sup> | 276.2 <sup>a</sup> | 5.362            | <0.001          |
| CATTD of fat <sup>5</sup>      | 0.924 <sup>a</sup> | 0.701 <sup>c</sup> | 0.792 <sup>b</sup> | 0.038            | 0.020           |
| Growth performance             |                    |                    |                    |                  |                 |
| SFI <sup>6</sup> , g/kg BW/d   | 38.46              | 39.03              | 39.96              | 1.02             | 0.365           |
| SADG <sup>7</sup> , g/kg BW/d  | 17.74 <sup>A</sup> | 15.11 <sup>B</sup> | 16.90 <sup>A</sup> | 0.76             | 0.064           |
| FCR <sup>8</sup>               | 2.16               | 2.58               | 2.36               | 0.46             | 0.106           |

66 <sup>abc</sup>Within a row, means with unlike superscripts differ (*P* < 0.05).

67 <sup>1</sup>Least square mean values for intake and growth performance were calculated from data and  
 68 dietary composition assays reported by Ndou et al., 2017.

69 <sup>2</sup>CON, Control diet; FM, Flaxseed meal-containing diet; OH, Oat hulls-containing diet.

70 <sup>3</sup>Standard error of treatment mean (n = 8 replicates per treatment).

71 <sup>4</sup>NSP, Non-starch polysaccharides.

72 <sup>5</sup>CATTD, Coefficient of apparent total tract digestibility of fat.

73 <sup>6</sup>SFI, Scaled feed intake.

74 <sup>7</sup>SADG, Scaled average daily weight gain.

75 <sup>8</sup>FCR, Feed conversion ratio.

76

77

78

79

80

81

82

83

84



85 Table S4. Histomorphometric characteristics of intestinal tissue in growing pigs fed experimental  
 86 diets<sup>1</sup>

| <sup>3</sup> Item | <sup>2</sup> Diet   |                    |                    | <sup>4</sup> SEM | <i>P</i> -value <sup>5</sup> |
|-------------------|---------------------|--------------------|--------------------|------------------|------------------------------|
|                   | CON                 | FM                 | OH                 |                  |                              |
| Duodenum          |                     |                    |                    |                  |                              |
| VH, μm            | 507.7 <sup>a</sup>  | 471.6 <sup>b</sup> | 464.4 <sup>b</sup> | 10.29            | 0.0004 <sup>G</sup>          |
| CD, μm            | 344.9 <sup>AB</sup> | 350.8 <sup>A</sup> | 324.6 <sup>B</sup> | 8.27             | 0.0568 <sup>G</sup>          |
| VH:CD             | 1.47 <sup>A</sup>   | 1.35 <sup>B</sup>  | 1.47 <sup>A</sup>  | 0.038            | 0.0732 <sup>G</sup>          |
| Jejunum           |                     |                    |                    |                  |                              |
| VH, μm            | 450.1 <sup>b</sup>  | 523.1 <sup>a</sup> | 458.5 <sup>b</sup> | 6.77             | <0.0001 <sup>P</sup>         |
| CD, μm            | 307.4               | 319.1              | 301.9              | 3.50             | 0.7892 <sup>G</sup>          |
| VH:CD             | 1.46 <sup>b</sup>   | 1.64 <sup>a</sup>  | 1.52 <sup>b</sup>  | 0.027            | <0.0001 <sup>NB</sup>        |
| Ileum             |                     |                    |                    |                  |                              |
| VH, μm            | 471.4 <sup>a</sup>  | 420.8 <sup>b</sup> | 404.3 <sup>c</sup> | 4.78             | <0.001 <sup>P</sup>          |
| CD, μm            | 286.2               | 295.5              | 278.1              | 12.64            | 0.3683 <sup>NB</sup>         |
| VH:CD             | 1.69 <sup>a</sup>   | 1.43 <sup>b</sup>  | 1.46 <sup>ab</sup> | 0.106            | 0.0369 <sup>G</sup>          |

87 <sup>1</sup>Least square mean values for histomorphometric characteristics.

88 <sup>abc</sup>Within a row, means with unlike superscripts differ (*P* < 0.05)

89 <sup>ABC</sup>Within a row, means with unlike superscripts differ (*P* ≤ 0.10).

90 <sup>2</sup>CON, Control diet; FM, Flaxseed meal-containing diet; OH, Oat hulls-containing diet.

91 <sup>3</sup>VH, villi height; CD, crypt depth; VCR, villi height to crypt depth ratio.

92 <sup>4</sup>Standard error of treatment mean (n = 8 replicates per treatment).

93 <sup>5</sup>Methods of analysis denoted by <sup>G</sup> (Gaussian), <sup>NB</sup> (Negative Binomial) and <sup>P</sup> (Poisson).

94

95

96

97

98

99

100

101

102

103

104

105

106

Table S5. Effect of diet on alpha-diversity indices<sup>1</sup> of cecal and ileal digesta microbiota of pigs fed control diet (CON), flaxseed meal (FM) and oat hulls (OH)

| Item                          | Ileum             |       |       |                  |                 | Cecum              |                    |                    |                  |                 |
|-------------------------------|-------------------|-------|-------|------------------|-----------------|--------------------|--------------------|--------------------|------------------|-----------------|
|                               | <sup>2</sup> Diet |       |       | SEM <sup>3</sup> | <i>P</i> -value | <sup>2</sup> Diet  |                    |                    | SEM <sup>3</sup> | <i>P</i> -value |
|                               | CON               | FM    | OH    |                  |                 | CON                | FM                 | OH                 |                  |                 |
| Observed_species <sup>4</sup> | 303               | 304   | 277   | 60.3             | 0.612           | 462 <sup>b</sup>   | 595 <sup>a</sup>   | 510 <sup>b</sup>   | 23.85            | <0.001          |
| Coverage <sup>5</sup>         | 0.955             | 0.955 | 0.959 | 0.010            | 0.673           | 0.975              | 0.973              | 0.974              | 0.0016           | 0.799           |
| Chao1 <sup>6</sup>            | 485               | 494   | 453   | 104.7            | 0.712           | 722 <sup>C</sup>   | 805 <sup>A</sup>   | 769 <sup>B</sup>   | 65.3             | 0.050           |
| Shannon <sup>7</sup>          | 5.827             | 5.583 | 5.418 | 0.598            | 0.575           | 5.700              | 6.035              | 6.126              | 0.328            | 0.313           |
| Simpson <sup>8</sup>          | 0.947             | 0.937 | 0.925 | 0.021            | 0.522           | 0.942 <sup>b</sup> | 0.951 <sup>a</sup> | 0.954 <sup>a</sup> | 0.0003           | <0.001          |

<sup>1</sup>Least square mean values for alpha biodiversity indices.

<sup>abc</sup>Within a row, means with unlike superscripts differ ( $P < 0.05$ )

<sup>ABC</sup>Within a row, means with unlike superscripts differ ( $P \leq 0.10$ ).

<sup>2</sup>CON, Control diet; FM, Flaxseed meal-containing diet; OH, Oat hulls-containing diet.

<sup>3</sup>Standard error of treatment mean (n = 8 replicates per treatment).

<sup>4</sup>Observed\_species is the unique OTUs (97% distance) found in the samples.

<sup>5</sup>Coverage estimates the percentage of the total species sequenced in samples.

<sup>6</sup>Chao richness index estimates the number of species or OTU presenting in samples.

<sup>7,8</sup>Indices of microbiota diversity, which take into account species richness and abundance.

Table S6. Effect of diet on alpha-diversity indices<sup>1</sup> of cecal and ileal mucosa-associated microbiota of pigs fed control diet (CON), flaxseed meal (FM) and oat hulls (OH)

| Item                          | Ileum              |                    |                     |                  |                 | Cecum              |                    |                    |                  |                 |
|-------------------------------|--------------------|--------------------|---------------------|------------------|-----------------|--------------------|--------------------|--------------------|------------------|-----------------|
|                               | <sup>2</sup> Diet  |                    |                     | SEM <sup>3</sup> | <i>P</i> -value | <sup>2</sup> Diet  |                    |                    | SEM <sup>3</sup> | <i>P</i> -value |
|                               | CON                | FM                 | OH                  |                  |                 | CON                | FM                 | OH                 |                  |                 |
| Observed_species <sup>4</sup> | 91.6 <sup>b</sup>  | 151.3 <sup>a</sup> | 115.8 <sup>ab</sup> | 1487             | 0.019           | 393 <sup>b</sup>   | 504 <sup>a</sup>   | 445 <sup>ab</sup>  | 3044             | 0.002           |
| Coverage <sup>5</sup>         | 0.973              | 0.963              | 0.962               | 0.021            | 0.246           | 0.978              | 0.967              | 0.978              | 0.0016           | 0.671           |
| Chao1 <sup>6</sup>            | 216.1              | 223.4              | 201.6               | 8.288            | 0.828           | 553 <sup>b</sup>   | 683 <sup>a</sup>   | 638 <sup>ab</sup>  | 9.103            | 0.039           |
| Shannon <sup>7</sup>          | 2.323 <sup>B</sup> | 3.945 <sup>A</sup> | 3.611 <sup>B</sup>  | 0.601            | 0.064           | 6.249 <sup>a</sup> | 6.279 <sup>a</sup> | 5.761 <sup>b</sup> | 0.130            | 0.015           |
| Simpson <sup>8</sup>          | 0.770              | 0.840              | 0.732               | 0.022            | 0.365           | 0.966              | 0.966              | 0.953              | 0.0021           | 0.144           |

<sup>1</sup>Least square mean values for alpha biodiversity indices.

<sup>abc</sup>Within a row, means with unlike superscripts differ ( $P < 0.05$ )

<sup>ABC</sup>Within a row, means with unlike superscripts differ ( $P \leq 0.10$ ).

<sup>2</sup>CON, Control diet; FM, Flaxseed meal-containing diet; OH, Oat hulls-containing diet.

<sup>3</sup>Standard error of treatment mean (n = 8 replicates per treatment).

<sup>4</sup>Observed\_species is the unique OTUs (97% distance) found in the samples.

<sup>5</sup>Coverage estimates the percentage of the total species sequenced in samples.

<sup>6</sup>Chao richness index estimates the number of species or OTU presenting in samples.

<sup>7,8</sup>Indices of microbiota diversity, which take into account species richness and abundance.

1 Table S7. Relative abundance of bacterial phyla in ileal digesta-associated microbiota of pigs fed  
 2 control diet (CON), flaxseed meal (FM) and oat hulls (OH) †

| Phyla present                                     | <sup>1</sup> Diets        |                           |                           | SEM <sup>2</sup> | <i>P</i> -value <sup>3</sup> |
|---------------------------------------------------|---------------------------|---------------------------|---------------------------|------------------|------------------------------|
|                                                   | CON                       | FM                        | OH                        |                  |                              |
| -----Abundant Phylum (>1% of population)-----     |                           |                           |                           |                  |                              |
| <i>Firmicutes</i>                                 | 60.21 ± 5.32 <sup>B</sup> | 73.23 ± 3.84 <sup>A</sup> | 72.92 ± 2.85 <sup>A</sup> | 6.612            | 0.081 <sup>G</sup>           |
| <i>Bacteroidetes</i>                              | 25.72 ± 4.22              | 20.05 ± 8.59              | 22.98 ± 1.12              | 5.321            | 0.772 <sup>P</sup>           |
| <i>Proteobacteria</i>                             | 1.12 ± 0.24 <sup>b</sup>  | 5.01 ± 0.33 <sup>a</sup>  | 2.82 ± 0.68 <sup>a</sup>  | 0.097            | <0.01 <sup>G</sup>           |
| Unclassified                                      | 11.25 ± 4.23 <sup>a</sup> | 1.05 ± 4.23 <sup>b</sup>  | 2.85 ± 3.53 <sup>b</sup>  | 2.361            | 0.023 <sup>G</sup>           |
| -----Low-abundant Phylum (<1% of population)----- |                           |                           |                           |                  |                              |
| <i>Spirochaetes</i>                               | 0.42 ± 0.22               | 0.35 ± 1.29               | 0.58 ± 0.42               | 0.831            | 0.362 <sup>P</sup>           |
| <i>Actinobacteria</i>                             | 0.21 ± 0.05               | 0.12 ± 0.08               | 0.33 ± 0.05               | 0.003            | 0.51 <sup>G</sup>            |
| <i>Cyanobacteria</i>                              | 0.02 ± 0.20               | 0.02 ± 0.02               | 0.03 ± 0.03               | 0.011            | 0.67 <sup>G</sup>            |
| <i>Tenericutes</i>                                | 0.01 ± 0.24               | 0.01 ± 0.33               | 0.02 ± 0.18               | 0.017            | 0.61 <sup>G</sup>            |
| <i>Elusimicrobia</i>                              | 0.01 ± 0.05               | 0.02 ± 0.18               | 0.01 ± 0.25               | 0.003            | 0.78 <sup>P</sup>            |
| <i>Fibrobacteres</i>                              | 0.01 ± 0.20               | 0.02 ± 0.12               | 0.03 ± 0.43               | 0.011            | 0.67 <sup>G</sup>            |
| <i>Synergistetes</i>                              | 0.01 ± 0.05               | 0.02 ± 0.08               | 0.01 ± 0.05               | 0.003            | 0.88 <sup>G</sup>            |

3 <sup>1</sup>CON, Control diet; FM, Flaxseed meal-containing diet; OH, Oat hulls-containing diet;

4 <sup>2</sup>SEM, standard error of means;

5 †Least square mean values (n = 8 replicates per treatment).

6 <sup>abc</sup>Mean values within a row with unlike superscripts are significantly different (*P* < 0.05).

7 <sup>ABC</sup>Mean values within a row with unlike superscripts are significantly different (0.05 < *P* < 0.10).

8 <sup>3</sup>Methods of analysis denoted by <sup>G</sup>(Gaussian), and <sup>P</sup>(Poisson).

9  
10  
11  
12  
13  
14  
15  
16  
17  
18  
19  
20  
21  
22  
23  
24  
25  
26  
27  
28  
29  
30

31 Table S8. Relative abundance of bacterial phyla in ileal mucosa-associated microbiota of pigs  
 32 fed control diet (CON), flaxseed meal (FM) and oat hulls (OH) †

| Phyla present                                     | <sup>1</sup> Diets         |                            |                           | <sup>2</sup> SEM | <i>P</i> -value <sup>3</sup> |
|---------------------------------------------------|----------------------------|----------------------------|---------------------------|------------------|------------------------------|
|                                                   | CON                        | FM                         | OH                        |                  |                              |
| -----Abundant Phylum (>1% of population)-----     |                            |                            |                           |                  |                              |
| <i>Bacteroidetes</i>                              | 13.22 ± 1.54 <sup>ab</sup> | 17.26 ± 2.56 <sup>a</sup>  | 9.01 ± 2.88 <sup>b</sup>  | 3.251            | <0.001 <sup>G</sup>          |
| <i>Firmicutes</i>                                 | 80.04 ± 5.97 <sup>a</sup>  | 66.25 ± 4.74 <sup>b</sup>  | 65.01 ± 4.81 <sup>b</sup> | 6.872            | 0.001 <sup>P</sup>           |
| <i>Proteobacteria</i>                             | 5.08 ± 6.61 <sup>b</sup>   | 14.09 ± 2.36 <sup>ab</sup> | 17.05 ± 3.13 <sup>a</sup> | 3.924            | 0.100 <sup>NB</sup>          |
| Unclassified                                      | 1.16 ± 1.69                | 2.11 ± 3.65                | 8.53 ± 6.59               | 6.542            | 0.361 <sup>G</sup>           |
| -----Low abundant Phylum (<1% of population)----- |                            |                            |                           |                  |                              |
| <i>Actinobacteria</i>                             | 0.41 ± 0.62 <sup>A</sup>   | 0.03 ± 0.09 <sup>C</sup>   | 0.11 ± 0.25 <sup>B</sup>  | 0.002            | 0.050 <sup>P</sup>           |
| <i>Spirochaetes</i>                               | 0.11 ± 0.15                | 0.05 ± 0.08                | 0.07 ± 0.11               | 0.051            | 0.551 <sup>G</sup>           |
| <i>Cyanobacteria</i>                              | 0.09 ± 0.07                | 0.08 ± 0.08                | 0.10 ± 0.11               | 0.055            | 0.961 <sup>G</sup>           |
| <i>Deferribacteres</i>                            | 0.01 ± 0.02 <sup>b</sup>   | 0.02 ± 0.03 <sup>b</sup>   | 0.06 ± 0.03 <sup>a</sup>  | 0.015            | 0.011 <sup>G</sup>           |
| <i>Synergistetes</i>                              | 0.02 ± 0.03                | 0.01 ± 0.02                | 0.01 ± 0.02               | 0.013            | 0.771 <sup>G</sup>           |
| <i>WPS-2</i>                                      | 0.01 ± 0.15                | 0.02 ± 0.02                | 0.02 ± 0.11               | 0.031            | 0.365 <sup>G</sup>           |
| <i>Elusimicrobia</i>                              | 0.01 ± 0.11                | 0.02 ± 0.08                | 0.03 ± 0.11               | 0.042            | 0.111 <sup>G</sup>           |

33 <sup>1</sup>CON, Control diet; FM, Flaxseed meal-containing diet; OH, Oat hulls-containing diet;

34 <sup>2</sup>SEM, standard error of means.

35 †Least square mean values (n = 8 replicates per treatment).

36 <sup>abc</sup>Mean values within a row with unlike superscripts are significantly different (*P* < 0.05).

37 <sup>ABC</sup>Mean values within a row with unlike superscripts are significantly different (*P* < 0.10).

38 <sup>3</sup>Methods of analysis denoted by <sup>G</sup> (Gaussian), <sup>NB</sup> (Negative Binomial) and <sup>P</sup> (Poisson).

39

40

41 Table S9. Phylogenetic composition of bacterial genus from illumina-sequencing of 16S rRNA  
 42 sequences in ileal digesta of pigs fed experimental diets

| Order (O), Family (F), genus (G)     | Diets <sup>1</sup>   |                     |                     | SEM <sup>2</sup> | P-value <sup>3</sup> |
|--------------------------------------|----------------------|---------------------|---------------------|------------------|----------------------|
|                                      | CON                  | FM                  | OH                  |                  |                      |
| .....Actinobacteria (P).....         |                      |                     |                     |                  |                      |
| Unclassified Coriobacteriaceae (F)   | 0.104 <sup>AB</sup>  | 0.154 <sup>A</sup>  | 0.079 <sup>B</sup>  | 0.031            | 0.068 <sup>G</sup>   |
| .....Bacteroidetes (P).....          |                      |                     |                     |                  |                      |
| Unclassified Bacteroidales (O)       | 0.543                | 1.024               | 0.543               | 0.434            | 0.614 <sup>P</sup>   |
| <i>Bacteroides</i>                   | 0.117                | 0.370               | 0.100               | 0.137            | 0.114 <sup>G</sup>   |
| <i>Prevotella</i>                    | 22.44 <sup>a</sup>   | 14.47 <sup>b</sup>  | 16.85 <sup>ab</sup> | 3.207            | 0.004 <sup>P</sup>   |
| <i>Parabacteroides</i>               | 0.067                | 0.083               | 0.046               | 0.040            | 0.659 <sup>G</sup>   |
| <i>CF231</i>                         | 1.15                 | 1.36                | 0.99                | 0.425            | 0.799 <sup>P</sup>   |
| <i>YRC22</i>                         | 0.083 <sup>b</sup>   | 0.342 <sup>a</sup>  | 0.163 <sup>ab</sup> | 0.099            | 0.048 <sup>G</sup>   |
| .....Firmicutes (P).....             |                      |                     |                     |                  |                      |
| <i>Lactobacillus</i>                 | 17.96 <sup>b</sup>   | 28.70 <sup>a</sup>  | 23.36 <sup>ab</sup> | 1.597            | 0.002 <sup>P</sup>   |
| <i>Streptococcus</i>                 | 5.56 <sup>B</sup>    | 9.08 <sup>A</sup>   | 7.09 <sup>AB</sup>  | 1.647            | 0.087 <sup>NB</sup>  |
| Unclassified Clostridiales (O)       | 3.12 <sup>b</sup>    | 4.02 <sup>a</sup>   | 1.82 <sup>c</sup>   | 0.225            | 0.015 <sup>G</sup>   |
| Unclassified Clostridiaceae (F)      | 3.94 <sup>b</sup>    | 8.54 <sup>a</sup>   | 4.40 <sup>b</sup>   | 1.681            | 0.002 <sup>P</sup>   |
| <i>Clostridium</i>                   | 0.395                | 0.355               | 0.267               | 0.142            | 0.658 <sup>G</sup>   |
| <i>Blautia</i>                       | 2.16                 | 1.25                | 2.58                | 0.711            | 0.195 <sup>P</sup>   |
| <i>Coprococcus</i>                   | 0.531 <sup>ab</sup>  | 0.357 <sup>b</sup>  | 0.754 <sup>a</sup>  | 0.142            | 0.037 <sup>G</sup>   |
| <i>Dorea</i>                         | 0.305 <sup>B</sup>   | 0.395 <sup>AB</sup> | 0.658 <sup>A</sup>  | 0.146            | 0.065 <sup>G</sup>   |
| <i>Roseburia</i>                     | 0.273                | 0.322               | 0.360               | 0.102            | 0.695 <sup>G</sup>   |
| Unclassified Ruminococcaceae (F)     | 3.65                 | 3.16                | 3.74                | 0.568            | 0.554 <sup>G</sup>   |
| <i>Ruminococcus</i>                  | 0.518                | 0.478               | 0.783               | 0.239            | 0.698 <sup>P</sup>   |
| <i>Faecalibacterium</i>              | 0.512                | 0.475               | 0.433               | 0.126            | 0.823 <sup>G</sup>   |
| <i>Oscillospira</i>                  | 0.353                | 0.539               | 0.383               | 0.226            | 0.836 <sup>P</sup>   |
| <i>Peptococcus</i>                   | 0.0708               | 0.1084              | 0.1208              | 0.046            | 0.536 <sup>G</sup>   |
| Unclassified Veillonellaceae (F)     | 2.48 <sup>a</sup>    | 1.62 <sup>ab</sup>  | 0.283 <sup>b</sup>  | 0.804            | 0.024 <sup>NB</sup>  |
| <i>Acidaminococcus</i>               | 0.500                | 0.217               | 0.071               | 0.119            | 0.108 <sup>P</sup>   |
| <i>Anaerovibrio</i>                  | 0.842                | 0.938               | 0.967               | 0.265            | 0.880 <sup>G</sup>   |
| <i>Dialister</i>                     | 0.308                | 0.138               | 0.175               | 0.106            | 0.262 <sup>G</sup>   |
| <i>Mitsuokella</i>                   | 5.18 <sup>ab</sup>   | 12.50 <sup>a</sup>  | 0.133 <sup>b</sup>  | 4.945            | 0.031 <sup>NB</sup>  |
| <i>Megasphaera</i>                   | 16.75                | 15.50               | 17.41               | 4.527            | 0.913 <sup>G</sup>   |
| <i>Phascolarctobacterium</i>         | 9.33 <sup>a</sup>    | 2.09 <sup>ab</sup>  | 1.11 <sup>b</sup>   | 5.212            | <0.001 <sup>NB</sup> |
| Unclassified Erysipelotrichaceae (F) | 0.0666 <sup>AB</sup> | 0.0418 <sup>B</sup> | 0.108 <sup>A</sup>  | 0.026            | 0.055 <sup>G</sup>   |
| <i>Bulleidia</i>                     | 1.32                 | 1.92                | 0.900               | 0.924            | 0.557 <sup>P</sup>   |
| .....Proteobacteria.....             |                      |                     |                     |                  |                      |
| <i>Succinivibrio</i>                 | 0.154                | 0.154               | 0.146               | 0.058            | 0.986 <sup>P</sup>   |
| Unclassified Enterobacteriaceae (F)  | 0.103 <sup>b</sup>   | 0.218 <sup>b</sup>  | 2.575 <sup>a</sup>  | 0.095            | 0.047 <sup>NB</sup>  |

43 <sup>1</sup>CON, Control diet; FM, Flaxseed meal-containing diet; OH, Oat hulls-containing diet;

44 <sup>2</sup>SEM, standard error of means (n = 8 replicates per treatment).

45 <sup>abc</sup>Mean values within a row with unlike superscripts are significantly different (P < 0.05).

46 <sup>ABC</sup>Mean values within a row with unlike superscripts are significantly different (P < 0.10).

47 <sup>3</sup>Methods of analysis denoted by G (Gaussian), <sup>NB</sup> (Negative Binomial) and <sup>P</sup> (Poisson).

48

49 Table S10. Phylogenetic composition of bacterial genus from illumina-sequencing of 16S rRNA  
 50 sequences in ileal mucosa of pigs fed experimental diets

| Order (O), Family (F), Genus     | Diets <sup>1</sup>  |                     |                     | SEM <sup>2</sup> | P-value <sup>3</sup> |
|----------------------------------|---------------------|---------------------|---------------------|------------------|----------------------|
|                                  | CON                 | FM                  | OH                  |                  |                      |
| .....Actinobacteria (P).....     |                     |                     |                     |                  |                      |
| Actinobacteria_unclassified      | 0.5694              | 0.0468              | 0.0103              | 0.332            | 0.169 <sup>G</sup>   |
| .....Bacteroidetes (P).....      |                     |                     |                     |                  |                      |
| Bacteroidales_unclassified (O)   | 4.70 <sup>b</sup>   | 24.48 <sup>a</sup>  | 20.42 <sup>a</sup>  | 6.788            | <0.001 <sup>P</sup>  |
| .....Firmicutes (P).....         |                     |                     |                     |                  |                      |
| <i>Lactobacillus</i>             | 9.95 <sup>b</sup>   | 58.83 <sup>a</sup>  | 59.48 <sup>a</sup>  | 11.223           | <0.001 <sup>NB</sup> |
| <i>Streptococcus</i>             | 3.71 <sup>AB</sup>  | 2.91 <sup>B</sup>   | 5.57 <sup>A</sup>   | 1.059            | 0.083 <sup>P</sup>   |
| Unclassified Clostridiales (O)   | 2.63 <sup>a</sup>   | 0.488 <sup>b</sup>  | 1.93 <sup>ab</sup>  | 1.101            | 0.048 <sup>NB</sup>  |
| Unclassified Clostridiaceae (F)  | 31.38 <sup>a</sup>  | 0.283 <sup>b</sup>  | 1.02 <sup>b</sup>   | 7.591            | <0.001 <sup>P</sup>  |
| Unclassified Lachnospiraceae (F) | 1.55                | 0.679               | 0.925               | 0.472            | 0.193 <sup>G</sup>   |
| Unclassified Ruminococcaceae (F) | 1.86                | 1.85                | 1.13                | 0.851            | 0.627 <sup>G</sup>   |
| Unclassified Veillonellaceae (F) | 7.53 <sup>a</sup>   | 2.46 <sup>b</sup>   | 5.09 <sup>ab</sup>  | 2.587            | 0.002 <sup>P</sup>   |
| <i>Veillonella</i>               | 0.137 <sup>b</sup>  | 2.79 <sup>a</sup>   | 0.372 <sup>b</sup>  | 0.384            | 0.004 <sup>P</sup>   |
| .....Proteobacteria (P).....     |                     |                     |                     |                  |                      |
| <i>Campylobacter</i>             | 0.2088              | 0.2251              | 0.2327              | 0.109            | 0.973 <sup>P</sup>   |
| <i>Helicobacter</i>              | 2.2358 <sup>a</sup> | 2.4393 <sup>a</sup> | 0.2583 <sup>b</sup> | 0.939            | 0.024 <sup>P</sup>   |

51 <sup>1</sup>CON, Control diet; FM, Flaxseed meal-containing diet; OH, Oat hulls-containing diet;

52 <sup>2</sup>SEM, standard error of means;

53 †Least square mean values (n = 8 replicates per treatment).

54 <sup>abc</sup>Mean values within a row with unlike superscripts are significantly different ( $P < 0.05$ ).

55 <sup>ABC</sup>Mean values within a row with unlike superscripts are significantly different ( $P < 0.10$ ).

56 <sup>3</sup>Methods of analysis denoted by G (Gaussian), <sup>NB</sup> (Negative Binomial) and <sup>P</sup> (Poisson).

57  
58  
59  
60  
61  
62  
63  
64  
65  
66  
67  
68  
69  
70  
71  
72  
73  
74  
75

76 Table S11. Relative abundance of bacterial phyla in cecal digesta-associated microbiota of pigs  
 77 fed control diet (CON), flaxseed meal (FM) and oat hulls (OH)  
 78

| Phyla present                                     | Diets <sup>1</sup>      |                          |                           | SEM <sup>2</sup> | <i>P</i> -value <sup>3</sup> |
|---------------------------------------------------|-------------------------|--------------------------|---------------------------|------------------|------------------------------|
|                                                   | CON                     | FM                       | OH                        |                  |                              |
| -----Abundant Phylum (>1% of population)-----     |                         |                          |                           |                  |                              |
| <i>Bacteroidetes</i>                              | 34.71±11.72             | 29.04±7.91               | 33.63±3.07                | 4.762            | 0.421 <sup>P</sup>           |
| <i>Firmicutes</i>                                 | 60.14±1.97 <sup>b</sup> | 64.08±0.73 <sup>a</sup>  | 59.70±0.67 <sup>b</sup>   | 1.031            | <0.001 <sup>G</sup>          |
| <i>Proteobacteria</i>                             | 1.11±0.43 <sup>c</sup>  | 5.65±0.91 <sup>a</sup>   | 2.05±0.50 <sup>b</sup>    | 0.633            | 0.049 <sup>P</sup>           |
| Unclassified                                      | 2.46±0.65               | 0.04±0.15                | 4.01±5.63                 | 3.658            | 0.215 <sup>G</sup>           |
| -----Low abundant Phylum (<1% of population)----- |                         |                          |                           |                  |                              |
| <i>Actinobacteria</i>                             | 0.236±0.06 <sup>A</sup> | 0.078±0.06 <sup>B</sup>  | 0.139±0.051 <sup>AB</sup> | 0.007            | 0.060 <sup>G</sup>           |
| <i>Chlamydiae</i>                                 | 0.565±0.01              | 0.263±0.532              | 0.273±0.004               | 0.251            | 0.592 <sup>P</sup>           |
| <i>Cyanobacteria</i>                              | 0.236±0.16 <sup>a</sup> | 0.078±0.031 <sup>b</sup> | 0.139±0.115 <sup>ab</sup> | 0.060            | 0.048 <sup>G</sup>           |
| <i>Deferribacteres</i>                            | 0.053±0.01              | 0.005±0.013              | 0.027±0.06                | 0.018            | 0.351 <sup>G</sup>           |
| <i>Elusimicrobia</i>                              | 0.031±0.05              | 0.025±0.041              | 0.052±0.032               | 0.011            | 0.123 <sup>P</sup>           |
| <i>Fibrobacteres</i>                              | 0.023±0.02              | 0.022±0.018              | 0.044±0.032               | 0.016            | 0.344 <sup>G</sup>           |
| <i>Synergistetes</i>                              | 0.028±0.02              | 0.029±0.017              | 0.022±0.019               | 0.010            | 0.736 <sup>G</sup>           |
| <i>TM7</i>                                        | 0.011±0.02              | 0.006±0.007              | 0.006±0.009               | 0.006            | 0.695 <sup>G</sup>           |
| <i>Tenericates</i>                                | 0.028±0.02 <sup>a</sup> | 0.005±0.013 <sup>b</sup> | 0.021±0.011 <sup>ab</sup> | 0.010            | 0.039 <sup>G</sup>           |
| <i>WPS-2</i>                                      | 0.078±0.07              | 0.027±0.0122             | 0.028±0.025               | 0.030            | 0.244 <sup>G</sup>           |

79 <sup>1</sup>CON, Control diet; FM, Flaxseed meal-containing diet; OH, Oat hulls-containing diet;

80 <sup>2</sup>SEM, standard error of means;

81 <sup>†</sup>Least square mean values (n = 8 replicates per treatment);

82 <sup>abc</sup>Mean values within a row with unlike superscripts are significantly different (*P* < 0.05);

83 <sup>ABC</sup>Mean values within a row with unlike superscripts are significantly different (*P* < 0.10);

84 <sup>3</sup>Methods of analysis denoted by <sup>G</sup> (Gaussian), <sup>n</sup> (Negative Binomial) and <sup>P</sup> (Poisson).

85

86



87 Table S12. Relative abundance of bacterial phyla in cecal mucosa-associated microbiota of pigs  
 88 fed control diet (CON), flaxseed meal (FM) and oat hulls (OH)

| Phyla present                                     | <sup>1</sup> Diets       |                          |                          | <sup>2</sup> SEM | <i>P</i> -value <sup>3</sup> |
|---------------------------------------------------|--------------------------|--------------------------|--------------------------|------------------|------------------------------|
|                                                   | CON                      | FM                       | OH                       |                  |                              |
| -----Abundant Phylum (>1% of population)-----     |                          |                          |                          |                  |                              |
| <i>Bacteroidetes</i>                              | 59.16±5.85 <sup>a</sup>  | 51.22±5.06 <sup>ab</sup> | 48.89±14.42 <sup>b</sup> | 4.104            | 0.008 <sup>P</sup>           |
| <i>Firmicutes</i>                                 | 36.06±5.26               | 38.22±7.77               | 34.90±13.66              | 5.272            | 0.257 <sup>P</sup>           |
| <i>Proteobacteria</i>                             | 3.05±2.35 <sup>b</sup>   | 9.23±6.26 <sup>ab</sup>  | 13.19±9.37 <sup>a</sup>  | 3.341            | <0.001 <sup>P</sup>          |
| Unclassified                                      | 0.87±1.326               | 0.514±0.633              | 2.63±1.11                | 1.363            | 0.635 <sup>G</sup>           |
| -----Low abundant Phylum (<1% of population)----- |                          |                          |                          |                  |                              |
| <i>Actinobacteria</i>                             | 0.028±0.03               | 0.025±0.01               | 0.021±0.02               | 0.010            | 0.743 <sup>G</sup>           |
| <i>Cyanobacteria</i>                              | 0.296±0.18               | 0.269±0.24               | 0.252±0.13               | 0.094            | 0.895 <sup>G</sup>           |
| <i>Deferribacteres</i>                            | 0.067±0.14               | 0.011±0.59               | 0.033±0.76               | 0.048            | 0.882 <sup>P</sup>           |
| <i>Elusimicrobia</i>                              | 0.023±0.03               | 0.016±0.02               | 0.014±0.02               | 0.011            | 0.682 <sup>G</sup>           |
| <i>Fibrobacteres</i>                              | 0.014±0.02               | 0.028±0.02               | 0.013±0.02               | 0.010            | 0.241 <sup>G</sup>           |
| <i>Spirochaetes</i>                               | 0.292±0.44 <sup>ab</sup> | 0.389±0.24 <sup>a</sup>  | 0.093±0.11 <sup>b</sup>  | 0.099            | 0.024 <sup>G</sup>           |
| <i>Synergistetes</i>                              | 0.022±0.01               | 0.035±0.02               | 0.024±0.02               | 0.010            | 0.286 <sup>P</sup>           |
| <i>TM7</i>                                        | 0.027±0.02               | 0.016±0.01               | 0.013±0.01               | 0.009            | 0.202 <sup>G</sup>           |

89 <sup>1</sup>CON, Control diet; FM, Flaxseed meal-containing diet; OH, Oat hulls-containing diet;

90 <sup>2</sup>SEM, standard error of means;

91 <sup>†</sup>Least square mean values (n = 8 replicates per treatment);

92 <sup>abc</sup>Mean values within a row with unlike superscripts are significantly different (*P* < 0.05);

93 <sup>ABC</sup>Mean values within a row with unlike superscripts are significantly different (*P* < 0.10);

94 <sup>3</sup>Methods of analysis denoted by <sup>G</sup> (Gaussian), <sup>n</sup> (Negative Binomial) and <sup>P</sup> (Poisson).

95

96

97 Table S13. Phylogenetic composition of bacterial genus from illumina-sequencing of 16S rRNA  
 98 sequences in cecal digesta of pigs fed experimental diets

| Order (O), Family (F), Genus       | Diets <sup>1</sup>  |                     |                     | SEM <sup>2</sup> | P-value <sup>3</sup> |
|------------------------------------|---------------------|---------------------|---------------------|------------------|----------------------|
|                                    | CON                 | FM                  | OH                  |                  |                      |
| .....Actinobacteria (P).....       |                     |                     |                     |                  |                      |
| <i>Bifidobacterium</i>             | 2.45                | 0.809               | 0.497               | 0.811            | 0.115 <sup>NB</sup>  |
| Unclassified Coriobacteriaceae (F) | 0.0511 <sup>b</sup> | 0.164 <sup>a</sup>  | 0.0875 <sup>b</sup> | 0.021            | <0.001 <sup>G</sup>  |
| .....Bacteroidetes (P).....        |                     |                     |                     |                  |                      |
| Unclassified Bacteroidales (O)     | 4.03 <sup>AB</sup>  | 2.77 <sup>B</sup>   | 5.49 <sup>A</sup>   | 0.873            | 0.066 <sup>P</sup>   |
| <i>Bacteroides</i>                 | 0.0704 <sup>b</sup> | 0.736 <sup>a</sup>  | 0.159 <sup>b</sup>  | 0.196            | 0.006 <sup>G</sup>   |
| Parabacteroides                    | 0.109               | 0.183               | 0.122               | 0.046            | 0.245 <sup>G</sup>   |
| <i>Prevotella</i>                  | 30.43 <sup>b</sup>  | 26.73 <sup>b</sup>  | 38.37 <sup>a</sup>  | 2.264            | 0.002 <sup>P</sup>   |
| CF231                              | 1.53 <sup>A</sup>   | 1.43 <sup>AB</sup>  | 1.06 <sup>B</sup>   | 0.192            | 0.070 <sup>G</sup>   |
| .....Firmicutes (P).....           |                     |                     |                     |                  |                      |
| <i>Lactobacillus</i>               | 6.41 <sup>b</sup>   | 16.13 <sup>a</sup>  | 12.87 <sup>ab</sup> | 2.977            | <0.001 <sup>P</sup>  |
| <i>Streptococcus</i>               | 8.29 <sup>a</sup>   | 5.18 <sup>b</sup>   | 7.03 <sup>ab</sup>  | 0.816            | 0.004 <sup>G</sup>   |
| Unclassified Clostridiales (O)     | 3.51                | 3.10                | 3.14                | 0.858            | 0.875 <sup>P</sup>   |
| Unclassified Clostridiaceae (F)    | 0.210               | 0.0149              | 0.159               | 0.249            | 0.117 <sup>NB</sup>  |
| <i>Clostridium</i>                 | 0.389 <sup>a</sup>  | 0.139 <sup>b</sup>  | 0.214 <sup>ab</sup> | 0.077            | 0.012 <sup>G</sup>   |
| Unclassified Lachnospiraceae (F)   | 0.572 <sup>a</sup>  | 0.425 <sup>ab</sup> | 0.309 <sup>b</sup>  | 0.109            | 0.078 <sup>G</sup>   |
| <i>Blautia</i>                     | 1.263 <sup>AB</sup> | 1.061 <sup>B</sup>  | 1.934 <sup>A</sup>  | 0.397            | 0.094 <sup>G</sup>   |
| <i>Coprococcus</i>                 | 0.453 <sup>b</sup>  | 0.351 <sup>b</sup>  | 0.824 <sup>a</sup>  | 0.086            | <0.001 <sup>G</sup>  |
| <i>Dorea</i>                       | 0.347 <sup>b</sup>  | 0.298 <sup>b</sup>  | 0.491 <sup>a</sup>  | 0.051            | 0.004 <sup>G</sup>   |
| <i>Roseburia</i>                   | 0.950 <sup>a</sup>  | 0.348 <sup>b</sup>  | 0.458 <sup>b</sup>  | 0.169            | 0.004 <sup>G</sup>   |
| <i>Shuttleworthia</i>              | 0.0364              | 0.0522              | 0.0094              | 0.022            | 0.152 <sup>P</sup>   |
| Unclassified Ruminococcaceae (F)   | 3.64                | 2.99                | 3.70                | 0.664            | 0.498 <sup>G</sup>   |
| <i>Ruminococcus</i>                | 1.01                | 0.685               | 1.03                | 0.035            | 0.078 <sup>NB</sup>  |
| <i>Faecalibacterium</i>            | 0.277               | 0.325               | 0.430               | 0.086            | 0.219 <sup>G</sup>   |
| <i>Oscillospira</i>                | 0.496               | 0.647               | 0.552               | 0.186            | 0.718 <sup>P</sup>   |
| <i>Peptococcus</i>                 | 0.0948              | 0.0802              | 0.1078              | 0.024            | 0.527 <sup>G</sup>   |

99 <sup>1</sup>CON, Control diet; FM, Flaxseed meal-containing diet; OH, Oat hulls-containing diet;

100 <sup>2</sup>SEM, standard error of means;

101 †Least square mean values (n = 8 replicates per treatment).

102 <sup>abc</sup>Mean values within a row with unlike superscripts are significantly different ( $P < 0.05$ ).

103 <sup>ABC</sup>Mean values within a row with unlike superscripts are significantly different ( $P < 0.10$ ).

104 <sup>3</sup>Methods of analysis denoted by G (Gaussian), <sup>NB</sup> (Negative Binomial) and <sup>P</sup> (Poisson).

105

106 Table S13. Continued

| Order (O), Family (F), genus         | Diets <sup>1</sup>   |                      |                     | SEM <sup>2</sup> | P-value <sup>3</sup> |
|--------------------------------------|----------------------|----------------------|---------------------|------------------|----------------------|
|                                      | CON                  | FM                   | OH                  |                  |                      |
| .....Firmicutes (P).....             |                      |                      |                     |                  |                      |
| Unclassified Veillonellaceae         | 1.21 <sup>AB</sup>   | 1.74 <sup>A</sup>    | 0.658 <sup>B</sup>  | 0.445            | 0.075 <sup>G</sup>   |
| <i>Acidaminococcus</i>               | 0.426 <sup>AB</sup>  | 0.698 <sup>A</sup>   | 0.148 <sup>B</sup>  | 0.240            | 0.098 <sup>G</sup>   |
| <i>Anaerovibrio</i>                  | 0.910                | 1.22                 | 0.942               | 0.319            | 0.569 <sup>G</sup>   |
| <i>Mitsuokella</i>                   | 0.0986               | 0.0655               | 0.102               | 0.032            | 0.477 <sup>G</sup>   |
| <i>Megasphaera</i>                   | 18.85                | 19.64                | 16.04               | 4.035            | 0.650 <sup>P</sup>   |
| <i>Phascolarctobacterium</i>         | 1.33 <sup>b</sup>    | 3.69 <sup>a</sup>    | 2.70 <sup>ab</sup>  | 0.628            | 0.011 <sup>P</sup>   |
| Unclassified Erysipelotrichaceae (F) | 0.00765 <sup>b</sup> | 0.00953 <sup>b</sup> | 0.0203 <sup>a</sup> | 0.007            | 0.019 <sup>G</sup>   |
| <i>Bulleidia</i>                     | 0.0421               | 0.0407               | 0.0328              | 0.016            | 0.815 <sup>G</sup>   |
| <i>Catenibacterium</i>               | 0.0282               | 0.0093               | 0.0250              | 0.010            | 0.134 <sup>G</sup>   |
| <i>Eubacterium</i>                   | 0.0126 <sup>B</sup>  | 0.0186 <sup>B</sup>  | 0.0453 <sup>A</sup> | 0.013            | 0.053 <sup>G</sup>   |
| <i>Sharpea</i>                       | 0.0405               | 0.0283               | 0.0313              | 0.024            | 0.872 <sup>G</sup>   |
| .....Proteobacteria (P).....         |                      |                      |                     |                  |                      |
| Unclassified Proteobacteria          | 0.777 <sup>b</sup>   | 1.831 <sup>a</sup>   | 1.109 <sup>ab</sup> | 0.364            | 0.026 <sup>NB</sup>  |
| <i>Campylobacter</i>                 | 0.8139               | 1.6408               | 1.2250              | 0.651            | 0.460 <sup>P</sup>   |
| <i>Succinivibrio</i>                 | 0.0951               | 0.1580               | 0.0797              | 0.056            | 0.352 <sup>G</sup>   |
| <i>Sutterella</i>                    | 0.0155               | 0.0298               | 0.0266              | 0.008            | 0.186 <sup>G</sup>   |

107 <sup>1</sup>CON, Control diet; FM, Flaxseed meal-containing diet; OH, Oat hulls-containing diet;108 <sup>2</sup>SEM, standard error of means;109 <sup>†</sup>Least square mean values (n = 8 replicates per treatment).110 <sup>abc</sup>Mean values within a row with unlike superscripts are significantly different (P < 0.05).111 <sup>ABC</sup>Mean values within a row with unlike superscripts are significantly different (P < 0.10).112 <sup>3</sup>Methods of analysis denoted by G (Gaussian), <sup>NB</sup> (Negative Binomial) and <sup>P</sup> (Poisson).

113

114 Table S14. Phylogenetic composition of bacterial genus from illumina-sequencing of 16S rRNA  
 115 sequences in cecal tissue of pigs fed experimental diets

| Phylum, Order, Family, genus           | Diets <sup>1</sup>  |                     |                     | SEM <sup>2</sup> | P-value <sup>3</sup> |
|----------------------------------------|---------------------|---------------------|---------------------|------------------|----------------------|
|                                        | CON                 | FM                  | OH                  |                  |                      |
| .....Actinobacteria (P).....           |                     |                     |                     |                  |                      |
| Unclassified Coriobacteriaceae         | 0.0294              | 0.0248              | 0.0204              | 0.010            | 0.668 <sup>G</sup>   |
| .....Bacteroidetes (P).....            |                     |                     |                     |                  |                      |
| Unclassified Bacteroidales (O)         | 1.83                | 1.92                | 1.40                | 0.426            | 0.437 <sup>G</sup>   |
| <i>Bacteroides</i>                     | 0.0865 <sup>B</sup> | 0.938 <sup>A</sup>  | 0.187 <sup>B</sup>  | 0.376            | 0.069 <sup>P</sup>   |
| <i>Parabacteroides</i>                 | 0.171 <sup>b</sup>  | 0.372 <sup>a</sup>  | 0.213 <sup>b</sup>  | 0.060            | 0.007 <sup>G</sup>   |
| <i>Prevotella</i>                      | 7.79 <sup>AB</sup>  | 7.12 <sup>B</sup>   | 10.51 <sup>A</sup>  | 2.986            | 0.069 <sup>P</sup>   |
| CF231                                  | 1.15                | 1.02                | 1.02                | 0.258            | 0.839 <sup>P</sup>   |
| YRC22                                  | 0.445 <sup>A</sup>  | 1.111 <sup>A</sup>  | 0.215 <sup>C</sup>  | 0.049            | 0.095 <sup>P</sup>   |
| .....Firmicutes (P).....               |                     |                     |                     |                  |                      |
| <i>Lactobacillus</i>                   | 1.44 <sup>a</sup>   | 1.52 <sup>a</sup>   | 0.536 <sup>b</sup>  | 0.392            | 0.045 <sup>G</sup>   |
| <i>Streptococcus</i>                   | 1.03                | 0.618               | 0.757               | 0.193            | 0.118 <sup>G</sup>   |
| Unclassified Clostridiales (O)         | 1.19                | 2.51                | 1.68                | 0.682            | 0.172 <sup>G</sup>   |
| Unclassified Clostridiaceae (F)        | 0.414 <sup>A</sup>  | 0.239 <sup>B</sup>  | 0.234 <sup>B</sup>  | 0.083            | 0.071 <sup>G</sup>   |
| <i>Clostridium</i>                     | 0.165               | 0.141               | 0.121               | 0.034            | 0.453 <sup>G</sup>   |
| Unclassified Lachnospiraceae (F)       | 0.414 <sup>a</sup>  | 0.239 <sup>b</sup>  | 0.234 <sup>b</sup>  | 0.083            | 0.071 <sup>P</sup>   |
| <i>Blautia</i>                         | 0.3131              | 0.3665              | 0.4364              | 0.253            | 0.888 <sup>G</sup>   |
| <i>Coprococcus</i>                     | 0.239 <sup>a</sup>  | 0.121 <sup>b</sup>  | 0.226 <sup>ab</sup> | 0.045            | 0.029 <sup>G</sup>   |
| <i>Dorea</i>                           | 0.199 <sup>A</sup>  | 0.102 <sup>B</sup>  | 0.219 <sup>A</sup>  | 0.047            | 0.052 <sup>G</sup>   |
| <i>Lachnospira</i>                     | 0.193 <sup>a</sup>  | 0.0536 <sup>b</sup> | 0.0875 <sup>b</sup> | 0.044            | 0.008 <sup>G</sup>   |
| <i>Roseburia</i>                       | 0.588 <sup>a</sup>  | 0.219 <sup>c</sup>  | 0.392 <sup>b</sup>  | 0.063            | <0.001 <sup>G</sup>  |
| Unclassified Ruminococcaceae (F)       | 4.01                | 2.98                | 2.92                | 0.682            | 0.210 <sup>P</sup>   |
| <i>Ruminococcus</i>                    | 0.259 <sup>a</sup>  | 0.135 <sup>b</sup>  | 0.193 <sup>b</sup>  | 0.032            | 0.008 <sup>G</sup>   |
| <i>Faecalibacterium</i>                | 0.814 <sup>a</sup>  | 0.380 <sup>ab</sup> | 0.334 <sup>b</sup>  | 0.187            | 0.032 <sup>G</sup>   |
| <i>Oscillospira</i>                    | 1.05 <sup>a</sup>   | 1.12 <sup>a</sup>   | 0.462 <sup>b</sup>  | 0.166            | 0.027 <sup>G</sup>   |
| Unclassified Peptostreptococcaceae (F) | 0.0147              | 0.0078              | 0.0124              | 0.001            | 0.342 <sup>P</sup>   |
| <i>Peptococcus</i>                     | 0.0246              | 0.0185              | 0.0146              | 0.007            | 0.413 <sup>NB</sup>  |

116 <sup>1</sup>CON, Control diet; FM, Flaxseed meal-containing diet; OH, Oat hulls-containing diet;

117 <sup>2</sup>SEM, standard error of means;

118 <sup>†</sup>Least square mean values (n = 8 replicates per treatment).

119 <sup>abc</sup>Mean values within a row with unlike superscripts are significantly different ( $P < 0.05$ ).

120 <sup>ABC</sup>Mean values within a row with unlike superscripts are significantly different ( $P < 0.10$ ).

121 <sup>3</sup>Methods of analysis denoted by G (Gaussian), <sup>NB</sup> (Negative Binomial) and <sup>P</sup> (Poisson).

122

123

124 Table S14. Continued

| Phylum, Order, Family, genus         | Diets <sup>1</sup>  |                     |                     | SEM <sup>2</sup> | <i>P</i> -value <sup>3</sup> |
|--------------------------------------|---------------------|---------------------|---------------------|------------------|------------------------------|
|                                      | CON                 | FM                  | OH                  |                  |                              |
| .....Firmicutes (P).....             |                     |                     |                     |                  |                              |
| Unclassified Veillonellaceae (F)     | 3.37a               | 1.17ab              | 1.08c               | 1.051            | 0.010 <sup>P</sup>           |
| <i>Acidaminococcus</i>               | 0.733b              | 3.14a               | 0.466b              | 1.190            | 0.001 <sup>P</sup>           |
| <i>Anaerovibrio</i>                  | 1.98 <sup>b</sup>   | 2.53 <sup>ab</sup>  | 5.21 <sup>a</sup>   | 1.069            | 0.005 <sup>NB</sup>          |
| <i>Mitsuokella</i>                   | 0.2705              | 0.1454              | 0.2411              | 0.063            | 0.126 <sup>NB</sup>          |
| <i>Megasphaera</i>                   | 13.40 <sup>a</sup>  | 10.90 <sup>ab</sup> | 6.01b               | 1.956            | 0.003 <sup>NB</sup>          |
| <i>Phascolarctobacterium</i>         | 4.2594              | 4.7350              | 4.6488              | 0.649            | 0.741 <sup>G</sup>           |
| <i>Veillonella</i>                   | 0.0142 <sup>b</sup> | 0.0765 <sup>a</sup> | 0.0034 <sup>b</sup> | 0.022            | 0.008 <sup>G</sup>           |
| Unclassified Mogibacteriaceae (F)    | 3.82 <sup>a</sup>   | 3.58 <sup>ab</sup>  | 1.29 <sup>c</sup>   | 2.137            | 0.025 <sup>P</sup>           |
| Unclassified Erysipelotrichaceae (F) | 0.0761              | 0.0727              | 0.1020              | 0.033            | 0.634 <sup>G</sup>           |
| .....Proteobacteria (P).....         |                     |                     |                     |                  |                              |
| Unclassified Proteobacteria          | 0.0755              | 0.302               | 0.330               | 0.156            | 0.341 <sup>G</sup>           |
| <i>Campylobacter</i>                 | 1.02 <sup>b</sup>   | 4.35 <sup>ab</sup>  | 5.28 <sup>a</sup>   | 2.401            | 0.029 <sup>NB</sup>          |
| Unclassified Succinivibrionaceae (F) | 0.0647              | 0.318               | 0.221               | 0.148            | 0.216 <sup>G</sup>           |
| <i>Succinivibrio</i>                 | 0.070 <sup>b</sup>  | 0.101 <sup>ab</sup> | 0.164 <sup>a</sup>  | 0.033            | 0.033 <sup>G</sup>           |
| <i>Sutterella</i>                    | 1.22 <sup>b</sup>   | 1.75 <sup>ab</sup>  | 5.36 <sup>a</sup>   | 3.084            | <0.001 <sup>P</sup>          |
| Unclassified Desulfovibrionaceae (F) | 0.034 <sup>B</sup>  | 0.035 <sup>B</sup>  | 0.083 <sup>A</sup>  | 0.053            | 0.577 <sup>G</sup>           |
| <i>Desulfovibrio</i>                 | 0.131               | 0.133               | 0.122               | 0.050            | 0.972 <sup>G</sup>           |
| Unclassified Enterobacteraceae (F)   | 0.110               | 0.375               | 0.520               | 0.268            | 0.336 <sup>G</sup>           |
| Unclassified Helicobacteraceae (F)   | 0.016 <sup>B</sup>  | 1.59 <sup>A</sup>   | 0.415 <sup>B</sup>  | 0.897            | 0.097 <sup>P</sup>           |
| <i>Flexispira</i>                    | 0.069 <sup>B</sup>  | 0.213 <sup>A</sup>  | 0.112 <sup>B</sup>  | 0.080            | 0.092 <sup>G</sup>           |
| <i>Helicobacter</i>                  | 0.099               | 0.0639              | 0.4830              | 0.326            | 0.379 <sup>G</sup>           |

125 <sup>1</sup>CON, Control diet; FM, Flaxseed meal-containing diet; OH, Oat hulls-containing diet;126 <sup>2</sup>SEM, standard error of means;127 <sup>†</sup>Least square mean values (n = 8 replicates per treatment).128 <sup>abc</sup>Mean values within a row with unlike superscripts are significantly different (*P* < 0.05).129 <sup>ABC</sup>Mean values within a row with unlike superscripts are significantly different (*P* < 0.10).130 <sup>3</sup>Methods of analysis denoted by G (Gaussian), <sup>NB</sup> (Negative Binomial) and <sup>P</sup> (Poisson).

131

132

133 Table S15. Correlations coefficients between selected bacterial taxa<sup>a</sup> and short chain fatty acids  
 134 (SCFA), bile acids (BA) and neutral sterols (NS) in ileal digesta

| Taxa                         | Variable <sup>1</sup> | Rho     | P-value |
|------------------------------|-----------------------|---------|---------|
| <i>YRC22</i>                 | Cholesterol           | 0.3599  | 0.036   |
| <i>Lactobacillus</i>         | CA-CDCA               | 0.4273  | 0.023   |
|                              | IDCA                  | -0.6441 | <0.001  |
| <i>Streptococcus</i>         | Fat digestibility     | 0.4170  | 0.017   |
| Clostridiales (O)            | Propionate            | 0.4656  | 0.046   |
|                              | LCA                   | 0.4752  | 0.042   |
|                              | DCA                   | 0.5105  | 0.035   |
|                              | IDCA                  | 0.3875  | 0.007   |
| Clostridiaceae (F)           | UDCA                  | 0.6003  | 0.004   |
|                              | LCA                   | 0.3806  | 0.042   |
|                              | Cholesterol           | 0.3431  | 0.046   |
| Erysipelotrichaceae (F)      | Triglycerides         | 0.6132  | 0.003   |
|                              | Triglycerides         | 0.5700  | 0.008   |
| <i>Mitsuokella</i>           | Triglycerides         | 0.5700  | 0.008   |
| Coriobacteriaceae (F)        | Propionate            | 0.5607  | 0.003   |
| Veillonellaceae (F)          | Acetate               | 0.5341  | 0.002   |
|                              | LCA                   | -0.3456 | 0.041   |
|                              | IDCA                  | -0.4135 | 0.011   |
| <i>Acidaminococcus</i>       | CA-CDCA               | -0.4640 | 0.033   |
|                              | Triglycerides         | 0.5066  | 0.028   |
| <i>Phascolarctobacterium</i> | Propionate            | 0.4327  | 0.015   |

135 <sup>a</sup>Bacterial taxa with relative abundance  $\geq 0.05\%$  of the community were used for the correlation  
 136 analysis. Only significant correlations are presented in the Table. <sup>1</sup>CA = Cholic acid; CDCA =  
 137 Chenodeoxycholic acid; DCA = Deoxycholic acid; IDCA = Isoleoxycholic acid; LCA =  
 138 Lithocholic acid; UDCA = Ursodeoxycholic acid..

139

140 Table S16. Correlations coefficients between selected bacterial taxa<sup>a</sup> and short chain fatty acids  
 141 (SCFA), and bile acids (BA) in ileal mucosa

| Taxa                 | Variable <sup>1</sup> | r      | P-value |
|----------------------|-----------------------|--------|---------|
| <i>Lactobacillus</i> | Propionate            | 0.7307 | <0.001  |
|                      | LCA                   | 0.5252 | 0.043   |
|                      | DCA                   | 0.6176 | 0.008   |
|                      | IDCA                  | 0.6402 | 0.005   |
| <i>Streptococcus</i> | Acetate               | 0.7306 | <0.001  |
|                      | DCA                   | 0.4729 | 0.004   |
| <i>Veillonella</i>   | Propionate            | 0.8992 | <0.001  |
|                      | Butyrate              | 0.4581 | 0.044   |
|                      | Valerate              | 0.5252 | 0.027   |

142 <sup>a</sup>Bacterial taxa with relative abundance  $\geq 0.05\%$  of the community were used for the correlation  
 143 analysis. Only significant correlations are presented in the Table. <sup>1</sup>DCA = Deoxycholic acid;  
 144 IDCA = Isodeoxycholic acid; LCA = Lithocholic acid.

146 Table S17. Correlations coefficient between selected bacterial taxa and short chain fatty acids  
 147 (SCFA), bile acids (BA) and neutral sterols (NS) in cecal digesta

| Taxa                 | Variable <sup>1</sup> | r       | P-value |
|----------------------|-----------------------|---------|---------|
| Bacteroidales (O)    | Butyrate              | -0.3998 | 0.025   |
|                      | Valerate              | -0.4167 | 0.015   |
| <i>Bacteroides</i>   | UDCA                  | 0.4356  | 0.022   |
|                      | Propionate            | -0.3714 | 0.042   |
| <i>Prevotella</i>    | Butyrate              | -0.3908 | 0.036   |
|                      | Valerate              | -0.4616 | 0.024   |
|                      | CA-CDCA               | 0.5745  | 0.011   |
|                      | UDCA                  | 0.5745  | 0.002   |
|                      | Coprostanol           | 0.5378  | 0.007   |
|                      | DCA                   | 0.6970  | 0.041   |
|                      | UDCA                  | 0.5666  | 0.039   |
| <i>Lactobacillus</i> | Acetate               | -0.4622 | 0.045   |
|                      | Valerate              | -0.3419 | 0.022   |
|                      | Fat digestibility     | 0.6188  | 0.004   |
| <i>Streptococcus</i> | DCA                   | -0.5795 | 0.008   |
|                      | UDCA                  | -0.5340 | 0.037   |
|                      | Triglycerides         | -0.5667 | 0.009   |
|                      | CA-CDCA               | -0.4578 | 0.041   |
|                      | Coprostanol           | -0.5132 | 0.022   |
| Lachnospiraceae (F)  | Acetate               | -0.4714 | 0.035   |
|                      | Butyrate              | -0.3530 | 0.043   |
|                      | DCA                   | -0.5007 | 0.038   |
|                      | UDCA                  | -0.4942 | 0.026   |
|                      | Triglycerides         | -0.4219 | 0.019   |
|                      | Propionate            | -0.5650 | 0.007   |
| <i>Clostridium</i>   | Butyrate              | -0.5007 | 0.013   |
|                      | Valerate              | -0.4789 | 0.043   |
|                      | CA-CDCA               | 0.5822  | 0.004   |
|                      | IDCA                  | 0.6012  | <0.001  |
|                      |                       |         |         |



150 Table S17. Continued

| Taxa                         | Variable          | r       | P-value |
|------------------------------|-------------------|---------|---------|
| <i>Dorea</i>                 | Butyrate          | -0.4504 | 0.034   |
|                              | Valerate          | -0.4861 | 0.046   |
|                              | Fat digestibility | 0.3802  | 0.025   |
|                              | CA-CDCA           | 0.4904  | 0.016   |
|                              | Coprostanol       | 0.4037  | 0.024   |
|                              | IDCA              | 0.4904  | 0.044   |
|                              | Triglycerides     | -0.3708 | 0.039   |
| <i>Roseburia</i>             | Acetate           | -0.5218 | 0.004   |
|                              | CA-CDCA           | -0.4552 | 0.028   |
|                              | Coprostanol       | -0.5245 | 0.032   |
|                              | DCA               | -0.5645 | 0.003   |
|                              | UDCA              | -0.5833 | 0.008   |
|                              | IDCA              | -0.4552 | 0.043   |
|                              | Triglycerides     | -0.4846 | 0.019   |
| Coriobacteriaceae (F)        | Acetate           | 0.6095  | 0.004   |
|                              | Butyrate          | 0.3965  | 0.048   |
|                              | Valerate          | -0.4255 | 0.029   |
|                              | DCA               | 0.4422  | 0.043   |
|                              | IDCA              | 0.5541  | 0.002   |
|                              | Triglycerides     | 0.7751  | <0.001  |
|                              | Coprostanol       | 0.4950  | 0.035   |
| <i>Acidaminococcus</i>       | Butyrate          | 0.5068  | 0.047   |
|                              | Valerate          | 0.6991  | <0.001  |
|                              | Fat digestibility | -0.6062 | 0.004   |
| <i>Phascolarctobacterium</i> | Coprostanol       | 0.3608  | 0.047   |
|                              | DCA               | 0.4086  | 0.042   |
|                              | UDCA              | 0.3899  | 0.015   |
| <i>Eubacterium</i>           | Coprostanol       | 0.4207  | 0.049   |

151 <sup>a</sup>Bacterial taxa with relative abundance  $\geq 0.05\%$  of the community were used for the correlation  
152 analysis. Only significant correlations are presented in the Table. CA = Cholic acid; CDCA =  
153 Chenodeoxycholic acid; DCA = Deoxycholic acid; IDCA = Isodeoxycholic acid; LCA =  
154 Lithocholic acid; UDCA = Ursodeoxycholic acid.

156 Table S18. Correlations coefficient between selected taxa<sup>a</sup> and volatile fatty acids, bile acids and  
 157 neutral sterols (NS) in cecal tissue

| Taxa                   | Variable          | r       | P-value |
|------------------------|-------------------|---------|---------|
| <i>Bacteroides</i>     | DCA               | 0.3666  | 0.069   |
|                        | UDCA              | 0.4050  | 0.042   |
| <i>Provotella</i>      | Cholesterol       | -0.6174 | 0.008   |
|                        | Triglycerides     | -0.5827 | 0.005   |
|                        | Acetate           | 0.4456  | 0.018   |
|                        | CA-CDCA           | -0.3948 | 0.037   |
|                        | Coprostanol       | -0.6315 | 0.006   |
| <i>Parabacteroides</i> | Acetate           | 0.3706  | 0.045   |
|                        | Butyrate          | 0.4061  | 0.011   |
|                        | Coprostanol       | 0.4124  | 0.044   |
|                        | DCA               | 0.4562  | 0.016   |
|                        | UDCA              | 0.5190  | 0.007   |
| YRC22                  | Propionate        | 0.3656  | 0.065   |
|                        | LCA               | 0.3431  | 0.061   |
| Clostridiaceae (F)     | CA-CDCA           | -0.4104 | 0.038   |
|                        | Coprostanol       | -0.6296 | 0.004   |
|                        | DCA               | -0.3893 | 0.057   |
| <i>Lachnospira</i>     | Butyrate          | 0.5034  | 0.006   |
|                        | Fat digestibility | 0.5512  | 0.003   |
|                        | Coprostanol       | -0.5478 | 0.002   |
|                        | LCA               | -0.3703 | 0.068   |
|                        | DCA               | -0.5556 | 0.005   |
|                        | UDCA              | -0.5801 | 0.011   |
| <i>Coprococcus</i>     | Propionate        | -0.3701 | 0.055   |
|                        | Butyrate          | -0.3557 | 0.079   |
|                        | Fat digestibility | 0.6607  | <0.001  |

158

159

160 Table S18. Continued

| Taxa                   | Variable          | r       | P-value |
|------------------------|-------------------|---------|---------|
| <i>Dorea</i>           | Triglycerides     | 0.3889  | 0.044   |
| <i>Megasphaera</i>     | LCA               | 0.4200  | 0.015   |
| <i>Roseburia</i>       | Valerate          | -0.4192 | 0.046   |
| <i>Veillonella</i>     | Fat digestibility | -0.3491 | 0.056   |
|                        | CA-CDCA           | -0.4002 | 0.088   |
|                        | Coprostanol       | -0.3649 | 0.072   |
|                        | LCA               | 0.5264  | 0.005   |
|                        | DCA               | 0.4311  | 0.014   |
|                        | UDCA              | 0.5726  | 0.002   |
| Mitsuokella            | Acetate           | -0.3522 | 0.091   |
|                        | UDCA              | -0.3762 | 0.055   |
| Succinivibrionaceae    | Acetate           | 0.3968  | 0.041   |
|                        | Coprostanol       | 0.3541  | 0.073   |
|                        | LCA               | 0.4244  | 0.014   |
|                        | DCA               | 0.5464  | 0.005   |
|                        | UDCA              | 0.4657  | 0.029   |
| Veillonellaceae        | Acetate           | -0.5216 | 0.008   |
|                        | DCA               | -0.4513 | 0.047   |
|                        | UDCA              | -0.3881 | 0.062   |
| <i>Acidaminococcus</i> | Butyrate          | 0.4308  | 0.037   |
|                        | Valerate          | 0.6503  | <0.001  |
|                        | Cholesterol       | 0.3833  | 0.053   |
|                        | Fat digestibility | -0.6984 | <0.001  |
| <i>Anaerovibrio</i>    | Acetate           | 0.4888  | 0.046   |
|                        | CA-CDCA           | 0.4791  | 0.023   |
|                        | Coprostanol       | 0.6271  | 0.004   |
| <i>Shutella</i>        | Acetate           | 0.4422  | 0.039   |
|                        | CA-CDCA           | 0.4553  | 0.016   |
|                        | LCA               | 0.3933  | 0.031   |
|                        | DCA               | 0.3862  | 0.025   |
| <i>Campylobacter</i>   | Acetate           | 0.5093  | 0.030   |
|                        | CA-CDCA           | 0.4209  | 0.044   |
|                        | Coprostanol       | 0.6016  | 0.007   |
| <i>Succinivibrio</i>   | Acetate           | 0.4423  | 0.014   |
|                        | Coprostanol       | 0.4318  | 0.034   |
| <i>Flexispira</i>      | Valerate          | 0.4448  | 0.010   |
|                        | Fat digestibility | -0.4661 | 0.057   |
| Helicobacteraceae      | Valerate          | 0.5951  | 0.008   |
|                        | Cholesterol       | 0.3774  | 0.063   |
|                        | Fat digestibility | -0.7192 | <0.001  |

161 <sup>a</sup>Bacterial taxa with relative abundance  $\geq 0.05\%$  of the community were used for the correlation  
162 analysis. Only significant correlations are presented in the Table. CA = Cholic acid; CDCA =  
163 Chenodeoxycholic acid; DCA = Deoxycholic acid; IDCA = Isoleoxycholic acid; LCA =  
164 Lithocholic acid; UDCA = Ursodeoxycholic acid.
